# Supplementary material
Source: PubMed Central journal article supplement (PMC3412328)
Supplement: supp_blood-2012-01-401760_blood-2012-01-401760-1.pdf [file supp_blood-2012-01-401760_blood-2012-01-401760-1.pdf]

**Supplemental Table S1. miR sequencing of double negative (DN) thymocytes.**

*DN thymocytes*

| <b>miRNA</b>   | <b><i>Lin28b</i>/WT ratio</b> | <b>counts in WT DN cells</b> | <b>miRNA</b>    | <b><i>Lin28b</i>/WT ratio</b> | <b>counts in WT DN cells</b> |
|----------------|-------------------------------|------------------------------|-----------------|-------------------------------|------------------------------|
| mmu-miR-449c   | 0.224                         | 61                           | mmu-miR-139-5p  | 7.93                          | 1117                         |
| mmu-miR-99a    | 0.247                         | 1059                         | mmu-miR-542-5p  | 5.76                          | 12                           |
| mmu-let-7i     | 0.251                         | 55414                        | mmu-miR-598     | 4.77                          | 12                           |
| mmu-miR-92b    | 0.264                         | 258                          | mmu-miR-542-3p  | 4.46                          | 332                          |
| mmu-let-7f     | 0.275                         | 301860                       | mmu-miR-450b-3p | 4.26                          | 22                           |
| mmu-miR-98     | 0.312                         | 3107                         | mmu-miR-223     | 3.98                          | 3333                         |
| mmu-miR-20b    | 0.320                         | 55202                        | mmu-miR-342-3p  | 3.95                          | 10761                        |
| mmu-let-7g     | 0.321                         | 89285                        | mmu-miR-338-3p  | 3.83                          | 29                           |
| mmu-let-7d     | 0.324                         | 21203                        | mmu-miR-139-3p  | 3.79                          | 213                          |
| mmu-miR-126-3p | 0.332                         | 4850                         | mmu-miR-135a    | 3.64                          | 7                            |
| mmu-miR-362-5p | 0.338                         | 611                          | mmu-miR-677     | 3.44                          | 9                            |
| mmu-miR-128    | 0.360                         | 18729                        | mmu-miR-195     | 3.39                          | 37                           |
| mmu-miR-106a   | 0.361                         | 12355                        | mmu-miR-196a    | 3.23                          | 76                           |
| mmu-miR-196b   | 0.383                         | 2179                         | mmu-miR-450b-5p | 3.20                          | 37                           |
| mmu-miR-671-3p | 0.392                         | 116                          | mmu-miR-669f    | 3.13                          | 217                          |
| mmu-let-7b     | 0.393                         | 158465                       | mmu-miR-365     | 3.08                          | 18                           |
| mmu-miR-181b   | 0.397                         | 92406                        | mmu-miR-450a-5p | 3.02                          | 114                          |
| mmu-miR-181d   | 0.398                         | 15847                        | mmu-miR-504     | 2.99                          | 14                           |
| mmu-miR-126-5p | 0.407                         | 221                          | mmu-miR-296-5p  | 2.93                          | 109                          |
| mmu-miR-18b    | 0.432                         | 1383                         | mmu-miR-99b     | 2.68                          | 1529                         |
| mmu-miR-449a   | 0.438                         | 195                          | mmu-miR-574-5p  | 2.67                          | 62                           |
| mmu-miR-181a   | 0.441                         | 352044                       | mmu-miR-150     | 2.62                          | 34939                        |
| mmu-miR-224    | 0.468                         | 35                           | mmu-miR-200b    | 2.60                          | 308                          |
| mmu-miR-708    | 0.470                         | 29                           | mmu-miR-342-5p  | 2.57                          | 1164                         |
| mmu-miR-18a    | 0.474                         | 16334                        | mmu-miR-130a    | 2.57                          | 92                           |

Counts refer to numbers of individual sequence tags for the specified miR.  
miRs with at least 25 counts in one sample and a 2-fold or greater change are reported.  
Ratios were calculated using percent of totals and counts are from the wild type tissue.

**Supplemental Table S2.** Mutation analysis in Lin28b mice.

| Sample ID | Diagnosis | Tissue | Notch1 HD | Notch1 JM | Notch1 PEST domain     | Notch1 del mutation | Bcl11b del mutation | Idh1 exon 3 | Idh2 exon 4 | Fbxw7 exon 8 | Fbxw7 exon 9 | Pten RT-PCR |
|-----------|-----------|--------|-----------|-----------|------------------------|---------------------|---------------------|-------------|-------------|--------------|--------------|-------------|
| 6145      | PTCL      | LN     | GL        | GL        | GL                     | N                   | N                   | GL          | GL          | GL           | GL           | GL          |
| 6168      | PTCL      | LN     | GL        | GL        | GL                     | N                   | N                   | GL          | GL          | GL           | GL           | GL          |
| 6179      | PTCL      | Sp     | GL        | GL        | GL                     | N                   | N                   | GL          | GL          | GL           | GL           | GL          |
| 6180      | PTCL      | LN     | GL        | GL        | GL                     | N                   | N                   | GL          | GL          | GL           | GL           | GL          |
| 6207      | PTCL      | LN     | GL        | GL        | GL                     | N                   | N                   | GL          | GL          | GL           | GL           | GL          |
| 6208      | PTCL      | LN     | GL        | GL        | GL                     | N                   | N                   | GL          | GL          | GL           | GL           | GL          |
| 6214      | PTCL      | LN     | GL        | GL        | GL                     | N                   | N                   | GL          | GL          | GL           | GL           | GL          |
| 6216      | PTCL      | LN     | GL        | GL        | GL                     | N                   | N                   | GL          | GL          | GL           | GL           | GL          |
| 6219      | PTCL      | Sp     | GL        | GL        | GL                     | N                   | N                   | GL          | GL          | GL           | GL           | GL          |
| 6220      | PTCL      | Sp     | GL        | GL        | GL                     | N                   | N                   | GL          | GL          | GL           | GL           | GL          |
| 6222      | PTCL      | Thy    | GL        | GL        | GL                     | N                   | N                   | GL          | GL          | GL           | GL           | GL          |
| 6230      | PTCL      | LN     | GL        | GL        | GL                     | N                   | N                   | GL          | GL          | GL           | GL           | GL          |
| 6235      | PTCL      | Sp     | GL        | GL        | GL                     | N                   | N                   | GL          | GL          | GL           | GL           | GL          |
| 6239      | pre-T LBL | Thy    | GL        | GL        | GL                     | N                   | N                   | GL          | GL          | GL           | GL           | GL          |
| 6348      | pre-T LBL | Thy    | GL        | GL        | <b>66279C&gt;CCTCC</b> | N                   | N                   | GL          | GL          | GL           | GL           | GL          |
| 6412      | PTCL      | LN     | GL        | GL        | GL                     | N                   | N                   | GL          | GL          | GL           | GL           | GL          |
| C3        | PTCL      | Sp     | GL        | GL        | GL                     | N                   | N                   | GL          | GL          | GL           | GL           | GL          |

LN: lymph node, Sp: spleen, Thy: thymus

HD: heterodimerization domain, JM: juxtamembrane domain,

PEST: Proline/Glutamic Acid/Serine/Threonine domain

GL, germline; N, negative

**Supplemental Table S3. Upregulated genes in *Lin28b*  
PTCL**

---

| <b>Gene Symbol</b> | <b>Average</b> | <b>SD</b> |
|--------------------|----------------|-----------|
| <i>Ccl11</i>       | 446.39         | 231.44    |
| <i>Ccl20</i>       | 388.36         | 604.61    |
| <i>Ccl8</i>        | 267.92         | 224.81    |
| <i>C4b</i>         | 126.23         | 110.28    |
| <i>Ccl7</i>        | 63.65          | 49.80     |
| <i>Il23r</i>       | 54.53          | 82.22     |
| <i>Il7</i>         | 32.66          | 38.22     |
| <i>Il1r1</i>       | 32.39          | 17.69     |
| <i>Cxcl5</i>       | 29.53          | 23.06     |
| <i>Cxcl1</i>       | 28.08          | 14.92     |

---

Acquired by PCR array assay (SA Bioscience) and compared with CD4+ WT splenocytes

**Supplemental Table S4. Primer sequences.**

|                                   | Forward                           | Reverse                         |
|-----------------------------------|-----------------------------------|---------------------------------|
| <i>Lin28b</i> transgene (Fig. 1)  | 5'-GGTTCAATTCGAAGTTCCTA-3'        | 5'-CATCCACTGGAATATCCAAGGG-3'    |
| Transgenic <i>Lin28b</i> (Fig. 5) | 5'-AGGCCTTGAGTCAATACGGGTAAC-3'    | 5'-TCACTGCATTCTAGTTGTGGTTTG-3'  |
| Endogenous <i>Lin28b</i>          | 5'-AGGCCTTGAGTCAATACGGGTAAC-3'    | 5'-GTTCCCTCAGCAGTAGTTAACATCC-3' |
| <i>Lin28a</i>                     | 5'-GCATCTGTAAGTGGTTCAACGTG-3'     | 5'-ACTCCCAATACAGAACAACACCAC-3'  |
| <i>Actb</i>                       | 5'-GTGGGCCGCTCTAGGCACCAA-3        | 5' CTCTTTGATGTCACGCACGATTTC-3'  |
| <i>Notch1</i> HD1                 | 5'-GGCTGAGTTTCTTTAGAGTC-3'        | 5'-CCTCCCCTGAGGTTACACCT-3'      |
| <i>Notch1</i> HD2                 | 5'-GAGTGTCCCATTGCGGGGCT-3'        | 5'-TGCAGAGGTCAGAAAGTGTT-3       |
| <i>Notch1</i> JM                  | 5'-GTGCAGGAGAGAATTTAGCG-3'        | 5'-TACATGCAGAAGGGCTTAGG-3'      |
| <i>Notch1</i> PEST domain         | 5'-GCCTCTGGAATGTGGGTGAT-3'        | 5'-TACCAGGGCCTGCCAACAC-3'       |
| <i>Notch1</i> PEST domain         | 5'-AAGGACCTCAAGGCACGGAG-3'        | 5'-GAGGTGTGGCTGTGATGGTG-3'      |
| <i>Notch1</i> 5' deletion         | 5'-ATGGTGGAATGCCTACTTTGTA-3'      | 5'-CGTTTGGGTAGAAGAGATGCTTTAC-3' |
| <i>Bcl11b</i> internal deletion   | 5'-GGCTGAATTTACAGGATGAGG-3'       | 5'-ACTGGAGTTTCCGATGGCC-3'       |
| <i>IDH1</i> exon3                 | 5'-GTCCAGCAAGCTCTGCGTGCAGG-3'     | 5'-ACCTCTCTTAAGGGTGTAGATGC-3'   |
| <i>IDH2</i> exon4                 | 5'-TCCCTCCTCCGGGATGACTTCTGGGGC-3' | 5'-TCAAGCCAAGGCTTCTGTGGGGAGC-3' |
| <i>FBXW7</i> exon8                | 5'-GTGATGGTGTCAGATAGCATTGG-3'     | 5'-CTGCACTATATCCTTAGTGTCC-3'    |
| <i>FBXW7</i> exon9                | 5'-TGGCCAGTTGATCTCCAAGTCTTCC-3'   | 5'-CAGCAACTTGACAGTAACTGAGG-3'   |
| <i>PTEN</i> RT-PCR                | 5'-AGCTTCTGCCATCTCTCTCC-3'        | 5'-AATCTGACACAATGTCCATTGCC-3'   |

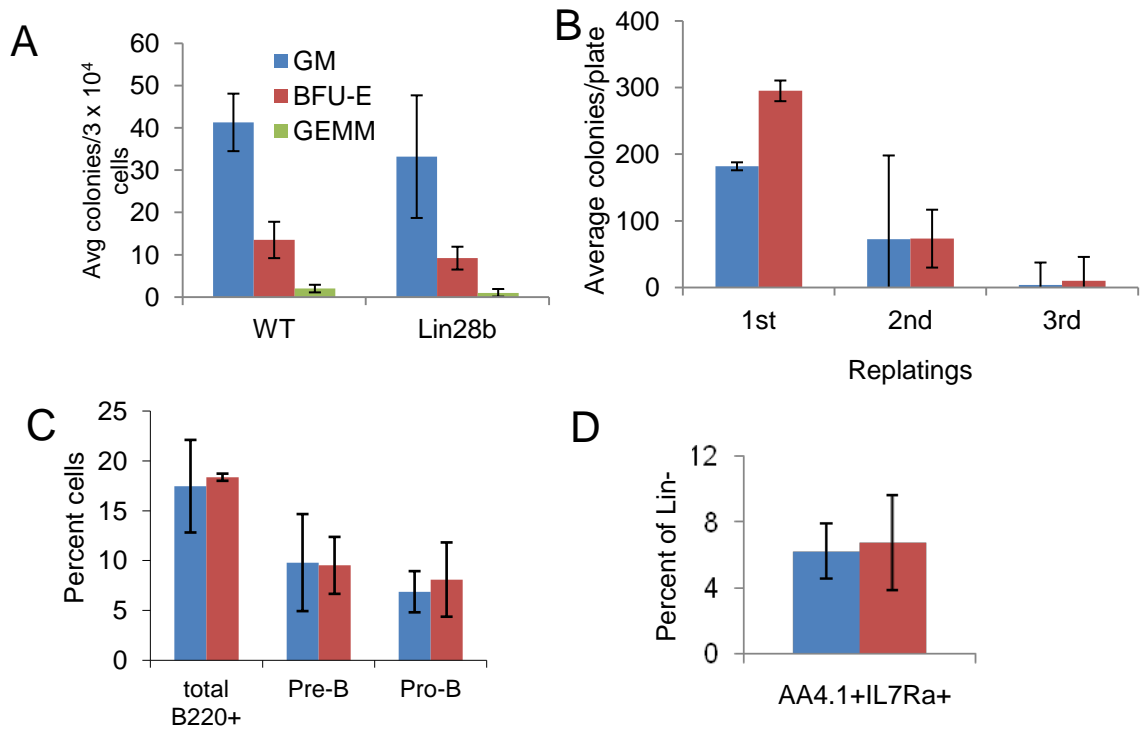

**Supplemental Figure S1. A)** CFU assay after 10 days, n= 3 mice per genotype at 2-3 months of age and 2 plates/mouse with an initial plating of  $3 \times 10^4$  bone marrow cells in M3434. **B)** CFC replating assay once a week in semi-solid culture. N= 3/group and 2 plates/mouse from initial cultures in A. **C)** Bone marrow B cell precursors: Pre-B (B220+CD43-) and Pro-B (B220+CD43+), n= 3. **D)** Common lymphoid progenitors in mice 2-3 months old, 3 mice/group. WT, blue; *Lin28b*, red in B, C, D.

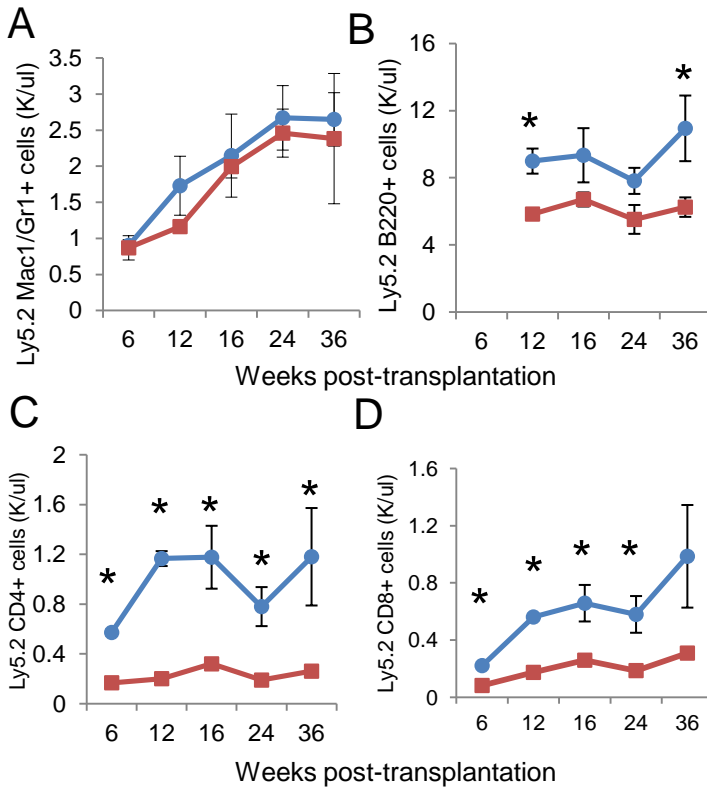

**Supplemental Figure S2. Engraftment assays show cell autonomy of lymphopenic phenotype.**  $1 \times 10^6$  donor BM cells (Ly5.2) were injected into lethally irradiated syngeneic recipient mice, and engraftment was quantified for **A)** Mac1<sup>+</sup>/Gr1<sup>+</sup>, **B)** B220<sup>+</sup>, **C)** CD4<sup>+</sup> and **D)** CD8<sup>+</sup> in the peripheral blood at the indicated time points. WT, blue; *Lin28b*, red. \*,  $p < 0.05$ .

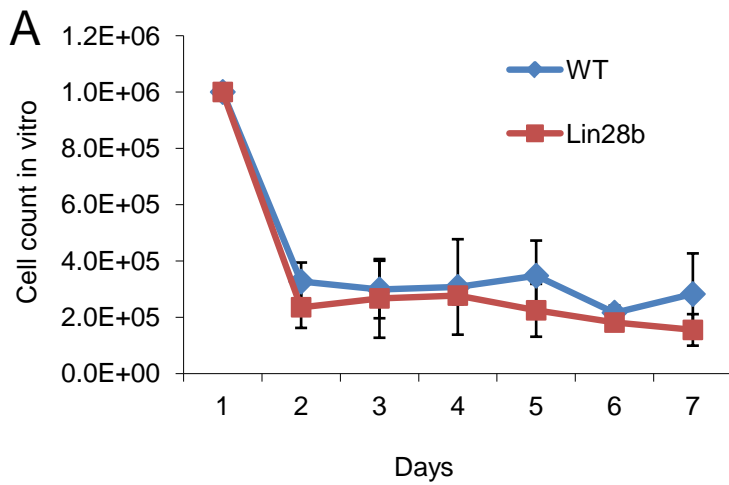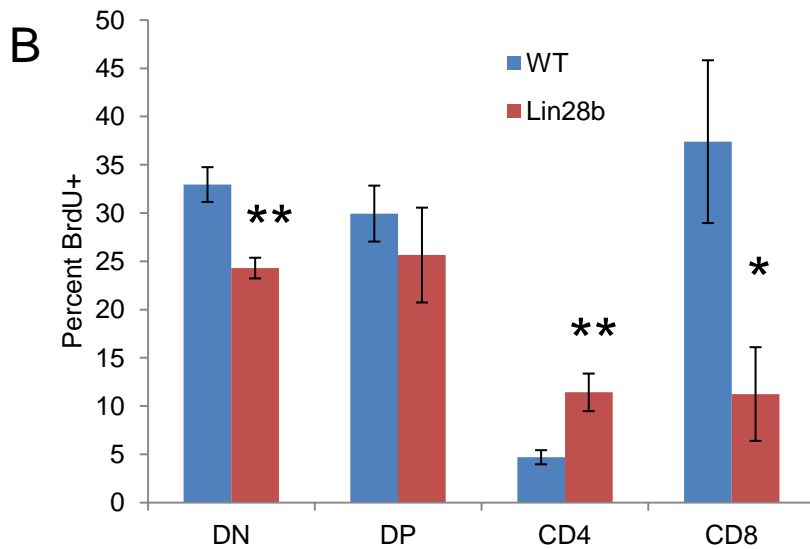

**Supplemental Figure S3. Proliferation studies of thymocytes.** **A)**  $1 \times 10^6$  thymocytes plated in vitro at Day 1 and live cells counted on subsequent days by trypan blue exclusion. **B)** BrdU positivity reported for each thymocyte subset. \*,  $p < 0.05$  and \*\*,  $p < 0.01$ .

**A**

Summary of *Scid* mice injected for tumorigenicity assay

|                    | Mice injected | Mice with tumor |
|--------------------|---------------|-----------------|
| WT thymocytes      | 3             | 0               |
| Lin28b tumor cells | 7             | 4*              |

\* one mouse found dead, decomposed

**B**

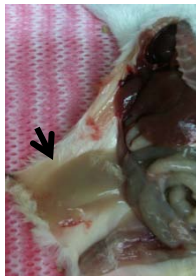

**C**

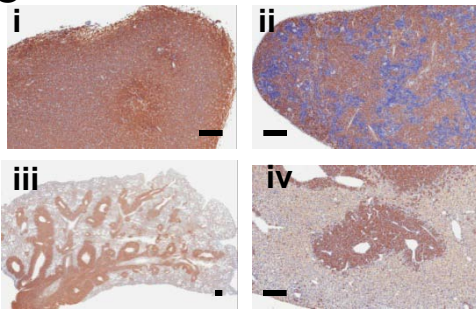

**D**

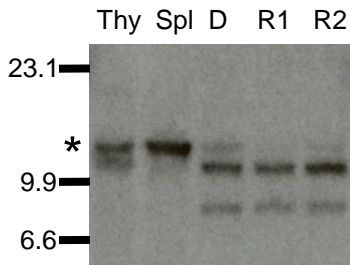

**Supplemental Figure S4. *Lin28b* tumor cells form subcutaneous tumors in *Scid* mice. **A**) Summary of tumor growth in *Scid* mice. **B**) Subcutaneous tumor at injection site in *Scid* mouse recipient. **C**) CD3 staining of (i) subcutaneous tumor, (ii) spleen, (iii) lung, and (iv) liver. Scale bar = 400  $\mu$ m. **D**) Southern blot reveals clonal *Tcrb* gene rearrangements. Thy, WT thymus; Spl, WT spleen; D, donor tumor 6266 from the lymph node; R1, recipient *Scid* C408; R2, recipient *Scid* C412. Samples digested with *Sst*I. \* denotes germline band.**



Mutated allele                    **C T C C** G G C T G G C A  
Exon 34    A C A C A C G G C T G G C A A C A C

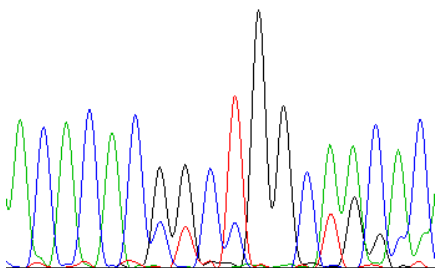

**Supplemental Figure S5. *Notch1* mutation found in a case of pre-T LBL in *Lin28b* mice.** Sequencing chromatogram of PCR product from mouse #6348. A 4 bp insertion (CTCC) within the Notch1 PEST domain leads to a frameshift, resulting in two superimposed sequences, one derived from the WT allele and one derived from the mutant allele.

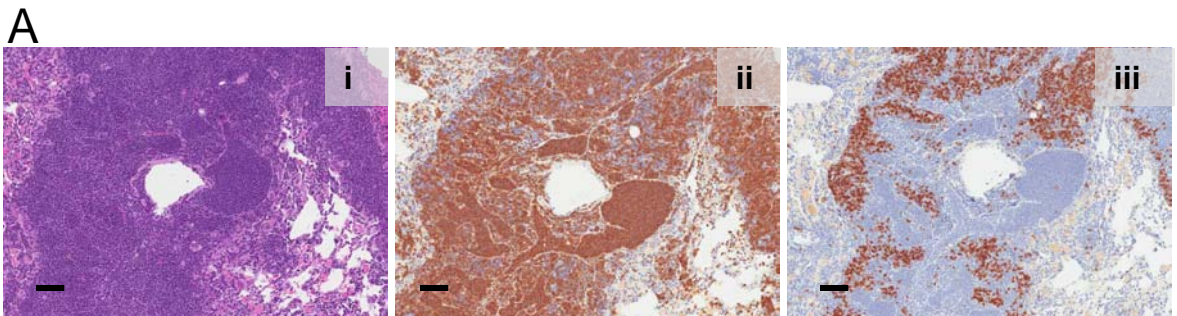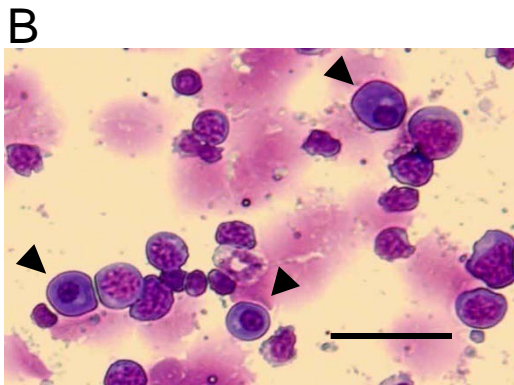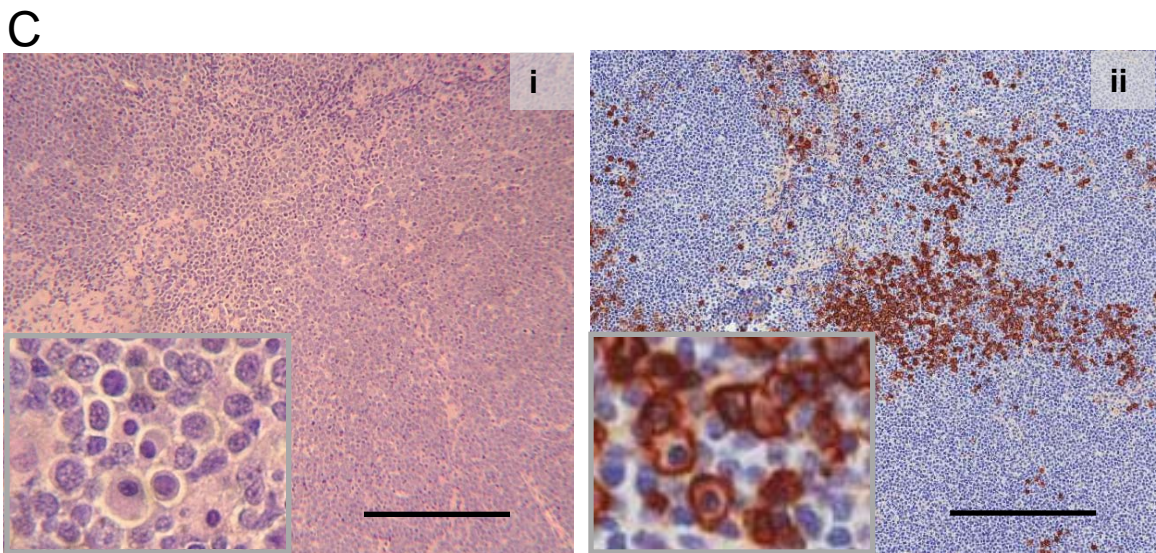

**Supplemental Figure S6. Infiltration of PTCL tumor masses with B and plasma cells. A)** Lung histology for mouse 6297 shows a tumor mass of predominantly CD3+ T cells, along with a patchy infiltrate of B220+ B cells around the periphery of the tumor: i) H&E, ii) CD3 and iii) B220. Scale bar= 100 $\mu$ m. **B)** Plasma cells (black arrows) in a cytospin from the lymph node of mouse 6206 stained with May-Giemsa. Scale bar= 25 $\mu$ m. **C)** H&E (i) and CD138 (ii) stains are shown for 6206 lymph node. Scale bar= 250 $\mu$ m.

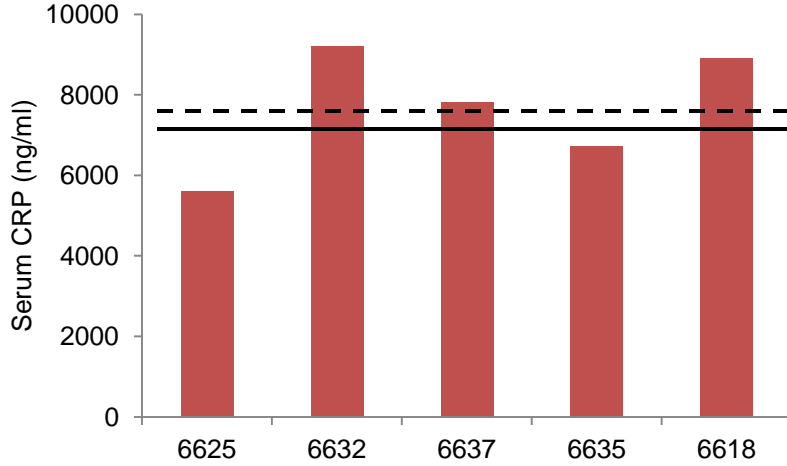

**Supplemental Figure S7. C-reactive protein levels in 5-8 month old *Lin28b* mice.** Solid line, mean (7160ng/ml) for age-matched WT serum samples, n=5. Dashed line, 1 standard deviation above the WT mean.
